# Supplementary material for: Optimization and Validation of a Harmonized Protocol for Generating Therapeutic-Grade Dendritic Cells in a Randomized Phase II Clinical Trial, Using Two Varied Antigenic Sources
Source: MDPI journal article supplement (doi:10.3390/vaccines12020112), 2024-01-23
Supplement: s1 [file s1]

**Optimization and Validation of a Harmonized Protocol for Generating Therapeutic-Grade Dendritic Cells in a Randomized Phase II Clinical Trial, using two varied antigenic sources.**

Supplementary figures:

**Supplementary Figure S1a**

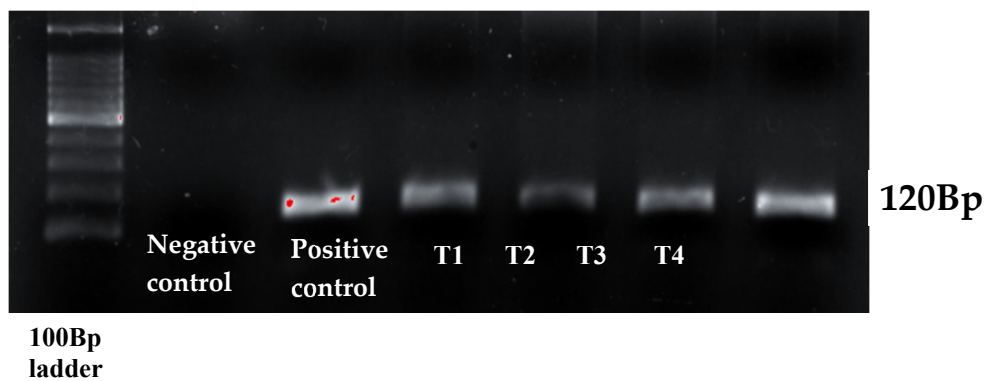

Supplementary Figure S1a: **Agarose Gel electrophoresis image of GP5+ GP6+ PCR products of 120bp-** representative tissue samples (T1 to T4) from lane 3 to 6

**Supplementary Figure S1b**

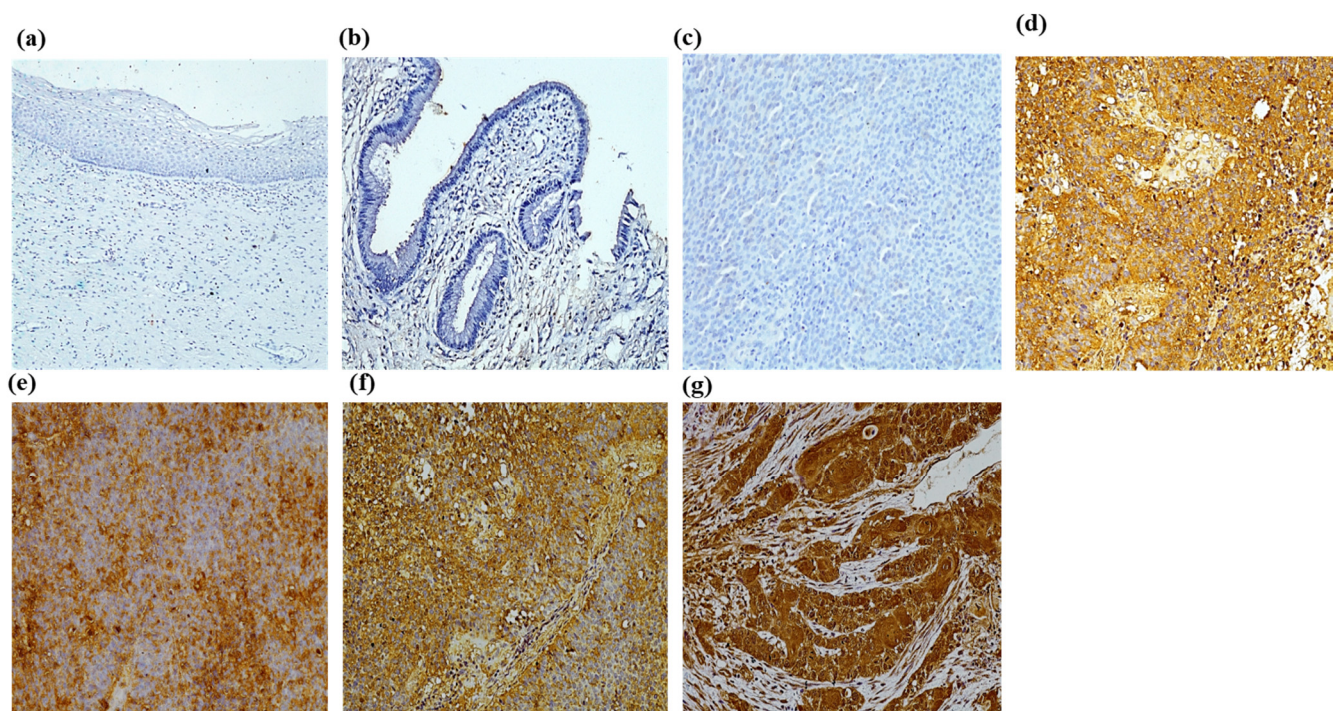

Supplementary Figure S1b: **Immunohistochemical staining of SPAG9 in cervical cancer tumor tissue.**

Weak staining of SPAG9 in non-cancer tissues (a) Ectocervix (Normal tissue); (b) Endocervix (Normal tissue); (c) Negative control; (d) Positive control (e) 50% of cervical squamous cell carcinoma tissue showing moderate

positivity for SPAG9 with 2+ intensity; (f) 80% of cervical squamous cell carcinoma tissue showing strong positivity for SPAG9 with 2+ intensity; (g) 90% of cervical squamous cell carcinoma tissue showing very strong positivity for SPAG9 with 3+ intensity ; magnification-20x.

**Supplementary Table S1: Inclusion and exclusion criteria for patient selection**

| <b>Inclusion criteria</b>                                                                                                                                                                        | <b>Exclusion criteria</b>                                                                      |
|--------------------------------------------------------------------------------------------------------------------------------------------------------------------------------------------------|------------------------------------------------------------------------------------------------|
| Subjects in the age group of 18-65                                                                                                                                                               | HIV or hepatitis B or C infection                                                              |
| Squamous cell carcinoma at Stage IIIB                                                                                                                                                            | Auto-immune disease and Acute infection                                                        |
| No prior radiotherapy or chemotherapy for any other malignancy                                                                                                                                   | Pregnancy and Unwillingness to use a medically accepted form of birth control during the study |
| Karnofsky score of 70 or greater                                                                                                                                                                 | Severe pulmonary or cardiac disease                                                            |
| No allergy to components of dendritic cells                                                                                                                                                      | Uncontrolled diabetes or hypertension                                                          |
| Hematological parameters<br>(LFT, RFT, SGOT, SGPT, and ALP)                                                                                                                                      | Acute or chronic medical or psychiatric conditions                                             |
| No contraindications for chemotherapy with cisplatin.                                                                                                                                            | Patients on immunosuppressive drugs including steroids.                                        |
| Evidence of a personally signed and dated informed consent document indicating that the subject (or a legally acceptable representative) has been informed of all pertinent aspects of the study | Significant obstructive uropathy                                                               |
| Subjects who are willing to comply with scheduled visits, treatment plans, laboratory tests, and other study procedures.                                                                         | Patients who had participated in any other clinical trial during the past 90 days.             |
